# Supplementary material for: Catalytic remediation of phenol contaminated wastewater using Cu–Zn hydroxide nitrate
Source: Royal Society of Chemistry journal article supplement (doi:10.1039/c5ra22326a), 2016-01-01
Supplement: c5ra22326a1.pdf [file c5ra22326a1.pdf]

## Supplementary information

# Catalytic remediation of phenol contaminated wastewater using Cu-Zn hydroxide nitrate

*Assadawoot Srikhaow*<sup>a</sup>, *Siwaporn Meejoo Smith*<sup>b,c,d\*</sup>, *Kanchana Uraisin*<sup>c,d</sup>,  
*Komkrit Suttiponparnit*<sup>e</sup>, *Chanapa Kongmark*<sup>f,g</sup>, *Chitiphon Chuaicham*<sup>e</sup>

<sup>a</sup> Materials Science and Engineering Graduate Program, Faculty of Science, Mahidol University, Rama VI Rd., Rajathevi, Bangkok, 10400 Thailand

<sup>b</sup> Center of Sustainable Energy and Green Materials, <sup>c</sup> Center of Excellence of Excellence for innovation in Chemistry and <sup>d</sup> Department of Chemistry, Faculty of Science, Mahidol University, Rama VI Rd., Rajathevi, Bangkok, 10400 Thailand

<sup>e</sup> Environmental Research and Management Department, PTT Research and Technology Institute, 71 M.2 Phahonyothin Rd., Sanubtub, Wangnoi, Ayutthaya 13170 Thailand

<sup>f</sup> Synchrotron Light Research Institute, 111 University Avenue, Muang, P.O. box 93 Nakhon Ratchasima, 30000, Thailand

<sup>g</sup> Department of Materials Science, Faculty of Science, Kasetsart University, 50 Ngam Wong Wan Rd., Ladyaow, Chatuchak, Bangkok, 10900, Thailand

KEYWORDS: Hydroxide nitrate; Catalytic wet peroxide oxidation; wastewater treatment; Phenol degradation

*Number of table : 1*

*Number of figures : 3*

**Table S1** Concentrations of Cu and Zn in the CWPO treated phenol solutions after hydroxide precipitation. The results at pH 5 correspond to the leaching of 6Cu-Zn catalyst during CWPO treatments performed at 35 °C, with initial pH of the phenol solution of 5.5, H<sub>2</sub>O<sub>2</sub> dosage of 3 mmol, catalyst loading of 3 and 6 g L<sup>-1</sup>. Note that, according to U.S. EPA requirement<sup>1</sup> for drinking water, the standard limits for Cu = 1.3 ppm and for Zn =5 ppm.

| Solution pH | Concentration of metal ions (mg.L <sup>-1</sup> ) |       |                                         |       |
|-------------|---------------------------------------------------|-------|-----------------------------------------|-------|
|             | Catalyst loading of 6 g.L <sup>-1</sup>           |       | Catalyst loading of 3 g.L <sup>-1</sup> |       |
|             | Cu                                                | Zn    | Cu                                      | Zn    |
| 5.5         | 112.67                                            | 22.89 | 77.43                                   | 15.90 |
| 6           | 63.56                                             | 16.74 | 63.14                                   | 14.86 |
| 7           | 6.25                                              | 11.09 | 4.91                                    | 6.99  |
| 7.5         | 0.65                                              | 6.36  | 1.82                                    | 5.01  |
| 8           | 0.15                                              | 3.23  | 0.02                                    | 0.61  |
| 9           | 0.01                                              | 0.17  | 0.01                                    | 0.13  |
| 10          | 0.01                                              | 0.08  | 0.01                                    | 0.08  |
| 11          | 0.01                                              | 0.06  | 0.01                                    | 0.08  |

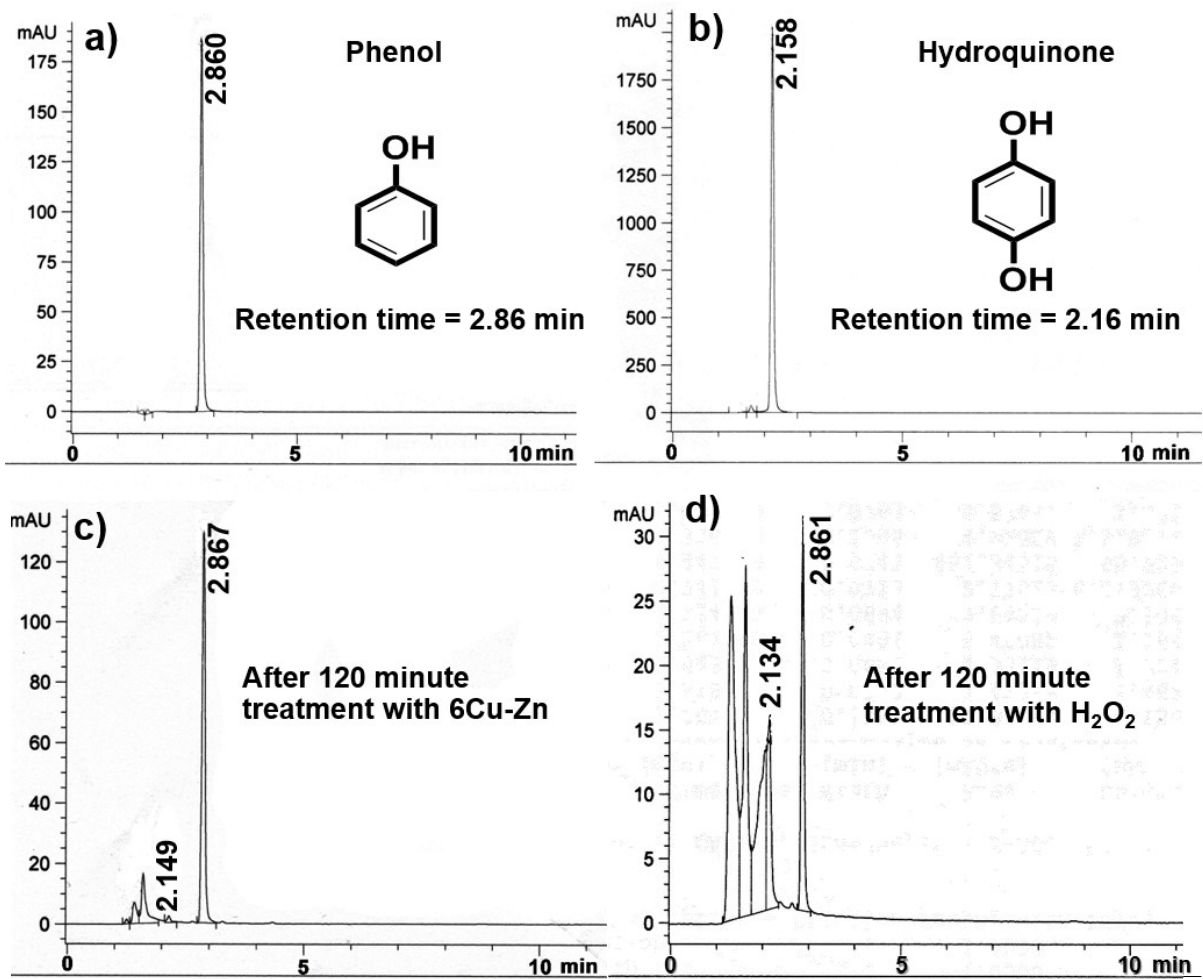

**Fig. S1** HPLC chromatogram of (a) phenol and (b) hydroquinone as reference compounds, and oxidized phenol solutions after 120 minute treatments with (c) 6Cu-Zn, and (d) 3 mmol H<sub>2</sub>O<sub>2</sub>. The peak at a retention time of 2.1 corresponds to hydroquinone and 2.8 relates to phenol.

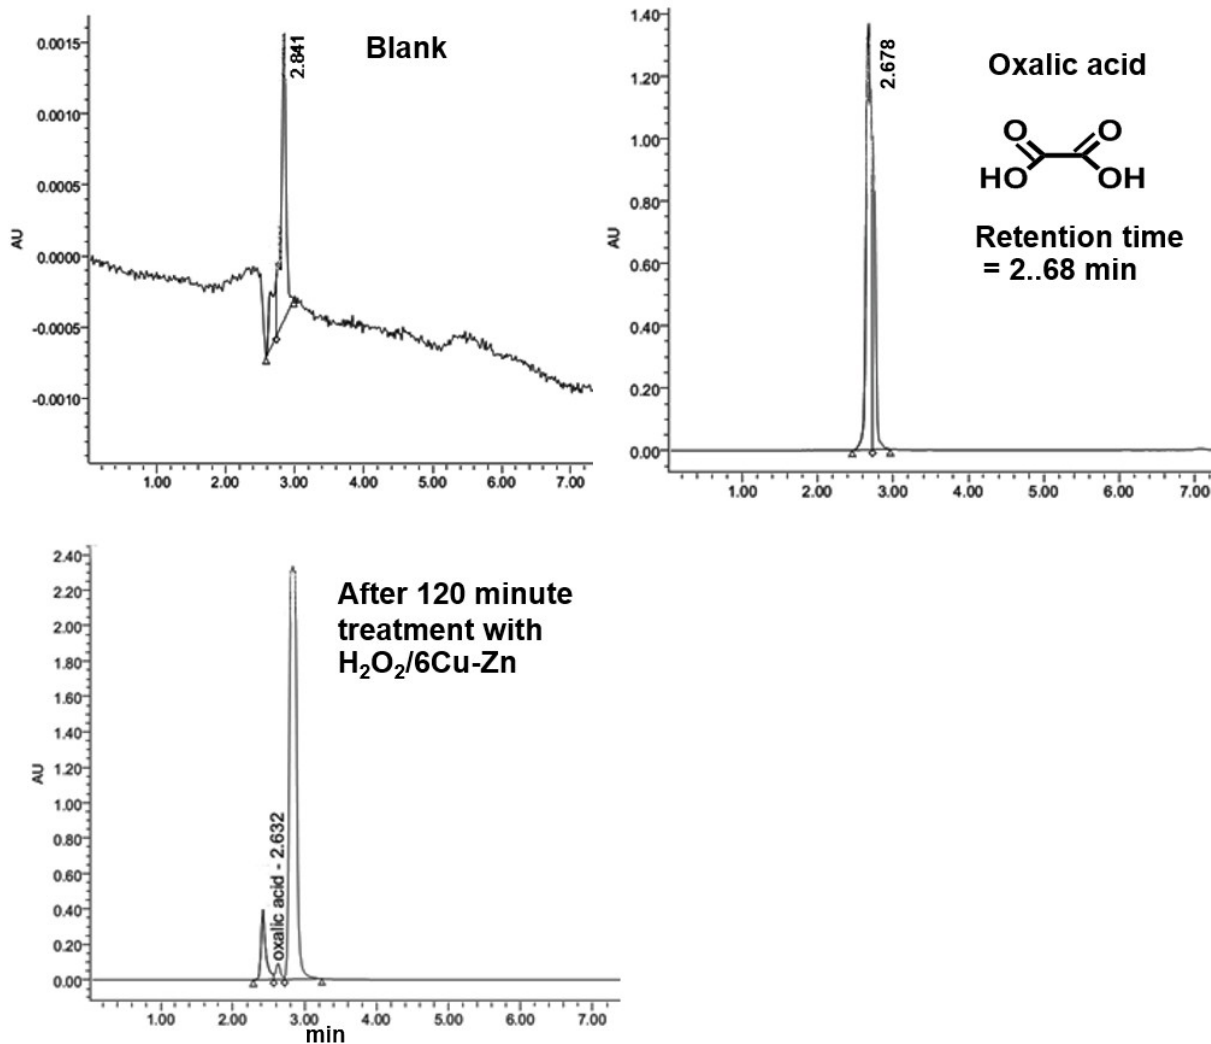

**Fig. S2** HPLC analysis of blank, oxalic acid and oxidized phenol solution after 2-h CWPO treatment using 6Cu-Zn. The peak at retention time of 2.8 corresponds to instrumental signal (with very low intensity), and the peak between 2.6-2.7 relates to oxalic acid. The unidentified peaks at retention time of 2.4-2.5 were out of the range to be identified as those corresponding to formic acid, maleic acid and succinic acid (other possible acid degradation products of phenol oxidation).

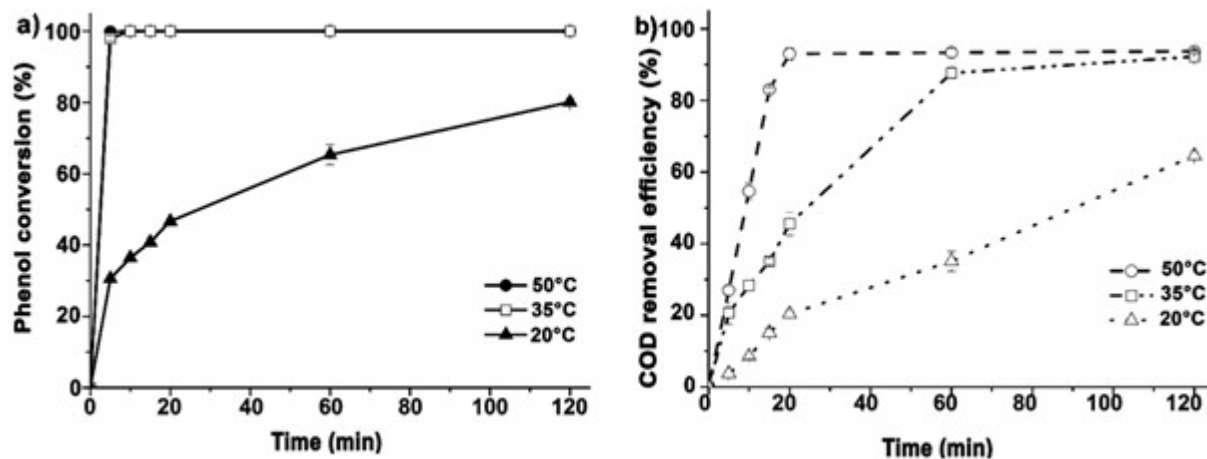

**Figure. S3** Temperature dependence of (a) phenol conversions and (b) COD removal efficiencies obtained from CWPO of 100 ppm aqueous phenol solution catalyzed by 6Cu-Zn. All experiments were conducted using the phenol solution with initial pH of 5.5, 3 mmol H<sub>2</sub>O<sub>2</sub>, and 3 g L<sup>-1</sup> catalyst loading.
